# Supplementary material for: Analysis of Heritability Across the Clinical Phenotypes of Frontotemporal Dementia and the Frequency of the C9ORF72 in a Colombian Population
Source: Front Neurol. 2021 Aug 30;12:681595. doi: 10.3389/fneur.2021.681595 (PMC8435669; doi:10.3389/fneur.2021.681595)
Supplement: Supplementary file 1 [file Table_1.XLSX]

## Sheet: Hoja1
Code	Gender	Phenotype	Family History	Onset	Assessment age	all sequencing complete	C9 complete	C9
BOG-116	M	svPPA	Low	2	64	yes	yes	Negative
BOG-117	M	PPA	High	8	69	yes	yes	Negative
BOG-118	M	bvFTD	Apparent Sporadic	10	62	yes	yes	Negative
BOG-120	M	bvFTD	High	5	69	yes	yes	Negative
BOG-121	F	svPPA	Apparent Sporadic	5	66	yes	yes	Negative
BOG-122	M	bvFTD	Low	4	70	yes	yes	Negative
BOG-123	F	bvFTD	Apparent Sporadic	3	68	yes	yes	Negative
BOG-124	F	PPA	Apparent Sporadic	4	53	yes	yes	Negative
BOG-126	M	bvFTD	Apparent Sporadic	4	58	yes	yes	Negative
BOG-128	M	PPA	Low	10	53	yes	yes	Negative
BOG-131	F	bvFTD	High	0,9	64	yes	yes	Negative
BOG-139	M	PPA	Apparent Sporadic	10	56	yes	yes	Negative
BOG-140	M	bvFTD	Apparent Sporadic	4	79	yes	yes	Negative
BOG-141	M	bvFTD	Apparent Sporadic	8	58	yes	yes	Negative
BOG-142	M	bvFTD	High		60	yes	yes	Negative
BOG-143	F	PPA	High	4	55	yes	yes	Negative
BOG-144	M	bvFTD	High	10	80	yes	yes	Negative
BOG-146	F	bvFTD	High	1	64	yes	yes	Negative
BOG-147	M	bvFTD	Apparent Sporadic	5	57	yes	yes	Negative
BOG0001	F	bvFTD	High	8	87	yes	yes	Negative
BOG0002	M	svPPA	Apparent Sporadic	12	55	yes	yes	Negative
BOG0003	M	svPPA	Apparent Sporadic	2	48	yes	yes	Negative
BOG0004	F	PPA	Medium	3	73	yes	yes	Negative
BOG0005	M	bvFTD	Apparent Sporadic	11	67	yes	yes	Negative
BOG0006	F	bvFTD	Apparent Sporadic	10	51	yes	yes	Negative
BOG0007	M	svPPA	Apparent Sporadic	4	66	yes	yes	Negative
BOG0009	M	PPA	Low	0.5	60	yes	yes	Negative
BOG0010	F	PPA	Apparent Sporadic	10	60	yes	yes	Negative
BOG0011	F	PPA	High	1	68	yes	yes	Negative
BOG0013	F	bvFTD	Apparent Sporadic	5	70	yes	yes	Negative
BOG0014	F	bvFTD	Apparent Sporadic	16	75	yes	yes	Negative
BOG0015	M	svPPA	Apparent Sporadic	4	53	yes	yes	Negative
BOG0016	M	PPA	High		71	yes	yes	Negative
BOG0017	F	bvFTD	High	0.5	59	yes	yes	Negative
BOG0018	F	bvFTD	Apparent Sporadic	10	68	yes	yes	Negative
BOG0019	F	bvFTD	Apparent Sporadic	5	71	yes	yes	Negative
BOG0020	F	bvFTD	High	14	52	yes	yes	Negative
BOG0021	F	bvFTD	Apparent Sporadic	10	74	yes	yes	Negative
BOG0022	F	bvFTD	Apparent Sporadic	7	57	yes	yes	Negative
BOG0024	M	bvFTD	Medium		67	yes	yes	Negative
BOG0025	F	PPA	Apparent Sporadic	5	76	yes	yes	Negative
BOG0026	M	PPA	High	6	75	yes	yes	Negative
BOG0027	F	bvFTD	Apparent Sporadic	3	62	yes	yes	Negative
BOG0028	F	bvFTD	Medium	2	60	yes	yes	Negative
BOG0029	M	bvFTD	Low	33	75	yes	yes	Negative
BOG0030	M	bvFTD	Medium	8	67	yes	yes	Negative
BOG0031	F	bvFTD	Apparent Sporadic	10	61	yes	yes	Negative
BOG0032	M	PPA	Apparent Sporadic	4	59	yes	yes	Negative
BOG0033	M	bvFTD	Low	8	78	yes	yes	Negative
BOG0034	F	bvFTD	Low	3	60	yes	yes	Negative
BOG0035	F	bvFTD	Apparent Sporadic	9	65	yes	yes	Negative
BOG0036	F	PPA	Medium	7	59	yes	yes	Negative
BOG0037	M	PPA	Apparent Sporadic	4	71	yes	yes	Negative
BOG0038	F	bvFTD	Apparent Sporadic	4	59	yes	yes	Negative
BOG0040	M	bvFTD	Low	7	69	yes	yes	Negative
BOG0041	F	bvFTD	Apparent Sporadic	7	66	yes	yes	Negative
BOG0042	M	PPA	Apparent Sporadic	5	60	yes	yes	Negative
BOG0047	M	bvFTD	Low	3	64	yes	yes	Negative
BOG0048	M	bvFTD	Medium	3	69	yes	yes	Negative
BOG0049	F	PPA	Apparent Sporadic	1.5	64	yes	yes	Negative
BOG0050	F	svPPA	Apparent Sporadic	4	72	yes	yes	Negative
BOG0051	F	bvFTD	Apparent Sporadic	5	65	yes	yes	Negative
BOG0052	F	svPPA	Apparent Sporadic	10	63	yes	yes	Negative
BOG0053	F	bvFTD	Apparent Sporadic	4	61	yes	yes	Negative
BOG0054	F	PPA	Apparent Sporadic	3	61	yes	yes	Negative
BOG0055	M	PPA	Apparent Sporadic	5	57	yes	yes	Negative
BOG0056	M	bvFTD	High	8	61	yes	yes	Negative
BOG0058	F	svPPA	Apparent Sporadic	11	71	yes	yes	Negative
BOG0059	F	bvFTD	Apparent Sporadic	2	76	yes	yes	Negative
BOG0062	F	bvFTD	Apparent Sporadic	3	74	yes	yes	Negative
BOG0063	M	svPPA	High	5	58	yes	yes	Negative
BOG0074	M	bvFTD	Low	1	56	yes	yes	Negative
BOG0079	F	PPA	Low		55	yes	yes	Negative
BOG0080	F	svPPA	Medium		60	yes	yes	Negative
BOG0082	M	bvFTD	Low	8	49	yes	yes	Negative
BOG0106	F	svPPA	Apparent Sporadic	5	55	yes	yes	Negative
BOG0108	M	bvFTD	Apparent Sporadic	1	60	yes	yes	Negative
BOG0109	M	svPPA	Low	4	59	yes	yes	Negative
BOG0112	F	bvFTD	Apparent Sporadic		56	yes	yes	Negative
BOG0113	F	bvFTD	Apparent Sporadic	8	59	yes	yes	Negative
BOG0115	M	bvFTD	Apparent Sporadic	3	56	yes	yes	Negative
BOG0151	M	bvFTD	Apparent Sporadic		60	yes	yes	Negative
BOG0154	M	bvFTD	Medium	10	77	yes	yes	Negative
BOG0159	F	lvPPA	Apparent Sporadic	4	63	yes	yes	Negative
BOG0165	M	bvFTD	Apparent Sporadic	2	64	yes	yes	Negative
BOG0167	M	bvFTD	Apparent Sporadic	21	61	yes	yes	Negative
BOG0172	M	PPA	Medium	2	60	yes	yes	Negative
BOG0177	M	bvFTD	Apparent Sporadic	2	66	yes	yes	Negative
BOG0180	F	bvFTD	Apparent Sporadic	3	63	yes	yes	Negative
BOG0181	M	bvFTD	Apparent Sporadic	4	62	yes	yes	Negative
BOG0184	M	svPPA	Apparent Sporadic	5	71	yes	yes	Negative
BOG0185	F	bvFTD	Apparent Sporadic	10	71	yes	yes	Negative
BOG0187	F	svPPA	Apparent Sporadic		70	yes	yes	Negative
BOG0190	F	bvFTD	Apparent Sporadic		66	yes	yes	Negative
BOG0193	F	bvFTD	Apparent Sporadic		60	yes	yes	Negative
BOG0194	F	lvPPA	High		52	yes	yes	Negative
BOG0195	F	bvFTD	High		70	yes	yes	Negative
BOG0198	M	bvFTD	Low		78	yes	yes	Negative
BOG0200	M	bvFTD	Apparent Sporadic		70	yes	yes	Negative
BOG0209	M	svPPA	Apparent Sporadic		53	yes	yes	Negative
BOG0218	M	nfvPPA	Apparent Sporadic		70	yes	yes	Negative
BOG0219	M	bvFTD	Low		69	yes	yes	Negative
BOG0221	F	bvFTD	Medium		70	yes	yes	Negative
BOG0224	M	svPPA	Apparent Sporadic		67	yes	yes	Negative
BOG0226	M	bvFTD	Low		58	yes	yes	Negative
BOG0242	F	bvFTD	Low		62	yes	yes	Negative
BOG0243	M	bvFTD	Apparent Sporadic		62	yes	yes	Negative
BOG0246	M	svPPA	Medium		56	yes	yes	Negative
BOG0247	F	lvPPA	Apparent Sporadic		56	yes	yes	Negative
BOG0252	F	svPPA	Apparent Sporadic		61	yes	yes	Negative
BOG0253	M	bvFTD	Apparent Sporadic		51	yes	yes	Negative
BOG0276	M	bvFTD	High		59	yes	yes	Negative
BOG0281	F	bvFTD	Medium		67	yes	yes	Negative
BOG0284	M	bvFTD	Apparent Sporadic		63	yes	yes	Negative
BOG0285	F	bvFTD	Low		62	yes	yes	Negative
BOG0286	F	lvPPA	High		66	yes	yes	Negative
BOG0290	M	bvFTD	High		66	yes	yes	Negative
BOG0291	F	bvFTD	High		66	yes	yes	Negative
BOG0295	F	bvFTD	Apparent Sporadic		74	yes	yes	Negative
BOG0306	M	PPA	Low	1	75	yes	yes	Negative
BOG0307	F	bvFTD	Medium	7	59	yes	yes	Negative
BOG0308	F	svPPA	Medium	3	62	yes	yes	Negative
BOG0309	M	svPPA	Low	14	63	yes	yes	Negative
BOG0310	M	bvFTD	Apparent Sporadic	1	70	yes	yes	Negative
BOG0311	F	bvFTD	High	3	74	yes	yes	Negative
BOG0312	M	PPA	Apparent Sporadic	1,5	73	yes	yes	Negative
BOG0313	M	bvFTD	High	3	63	yes	yes	Negative
BOG0314	M	bvFTD	High	2	79	yes	yes	Negative
BOG0315	F	bvFTD	Apparent Sporadic	1	64	yes	yes	Repeat Expansion
BOG0316	M	bvFTD	No biological family data	8	65	yes	yes	Negative
BOG0317	F	bvFTD	Apparent Sporadic	1	58	yes	yes	Negative
BOG0319	M	PPA	Low	2	59	yes	yes	Negative
